# Supplementary material for: Designing the bioproduction of Martian rocket propellant via a biotechnology-enabled in situ resource utilization strategy
Source: PubMed Central journal article supplement (PMC8546151; doi:10.1038/s41467-021-26393-7), 2021-10-25
Supplement: 41467_2021_26393_MOESM1_ESM.pdf [file 41467_2021_26393_MOESM1_ESM.pdf]

**Designing the bioproduction of Martian rocket propellant *via* a  
biotechnology-enabled *in situ* resource utilization strategy**

Kruyer *et al.*

**Supplementary Table 1. Cyanobacterial growth model parameters.**

| Model parameter | Parameter definition                        | Parameter value biofilm                                     | Parameter value suspended      | Source         |
|-----------------|---------------------------------------------|-------------------------------------------------------------|--------------------------------|----------------|
| $P$             | Biomass productivity                        | 6.54                                                        | 6.6                            |                |
| $F$             | Ratio of light absorption area to land area | 1.84                                                        | 1.84                           | This work      |
| $\alpha$        | Photosynthetic efficiency                   | 0.061 mol C x mol photons <sup>-1</sup>                     |                                | [1]            |
| $E_K$           | optimal photon flux <sup>a</sup>            | 161.01 $\mu\text{mol photons x m}^{-2}\text{s}^{-1}$        |                                | [1], this work |
| $E_0$           | photon flux at reactor surface on Mars      | 142.8 $\mu\text{mol photons x m}^{-2}\text{s}^{-1}$         |                                | [2]            |
| $k$             | light penetration parameter                 | 8750 m <sup>-1</sup>                                        | 175 m <sup>-1</sup>            | [1]            |
| $D$             | reactor diameter                            | 0.00025 m [3]                                               | 0.04 m [4]                     | This work      |
| $\gamma$        | g biomass per mole of carbon fixed          | 22.2 g DCW x mol C <sup>-1</sup>                            |                                | [4]            |
| $t_1$           | Light cycle time (12 hrs photosynthesis)    | 43200 s                                                     | 43200 s                        | [1]            |
| $R_0$           | cellular respiration rate <sup>a</sup>      | 0.001395 $\mu\text{mol C x mg Chl}^{-1} \text{ x min}^{-1}$ |                                | [1], this work |
| $C_c$           | areal chlorophyll content                   | 135 mg Chl x m <sup>-3</sup>                                | 18000 mg Chl x m <sup>-3</sup> | [1]            |
| $t_2$           | total day cycle time (24 hrs)               | 84,600 s                                                    | 84,600 s                       | [1]            |

<sup>a</sup> At 25°C

**Supplementary Table 2. Temperature effect on cyanobacteria biofilm productivity.**

| Temperature (°C) | Productivity (g/m <sup>2</sup> /day) | % Increase over 25°C | Added heat (kJ)        |
|------------------|--------------------------------------|----------------------|------------------------|
| 25               | 6.64                                 | 0%                   | 0                      |
| 30               | 7.44                                 | 12%                  | 2.32 x 10 <sup>6</sup> |
| 35               | 8.05                                 | 21%                  | 4.64 x 10 <sup>6</sup> |

**Supplementary Table 3. Light effect on cyanobacteria biofilm productivity.**

| Temperature (°C) | Light flux | Productivity (g/m <sup>2</sup> /day) | % Increase over Mars base case |
|------------------|------------|--------------------------------------|--------------------------------|
| 25               | 142.8      | 6.64                                 | 0%<br>Mars base case           |
|                  | 150        | 6.88                                 | 4%                             |
|                  | 175        | 7.65                                 | 15%                            |
|                  | 200        | 7.34                                 | 11%                            |
|                  | 225        | 8.97                                 | 35%                            |
|                  | 250        | 9.54                                 | 44%                            |
|                  | 285.6      | 10.27                                | 55%                            |
| 30               | 142.8      | 7.44                                 | 12%                            |
|                  | 150        | 7.75                                 | 17%                            |
|                  | 175        | 8.74                                 | 32%                            |
|                  | 200        | 9.65                                 | 45%                            |
|                  | 225        | 10.5                                 | 58%                            |
|                  | 250        | 11.28                                | 70%                            |
| 35               | 142.8      | 8.05                                 | 21%                            |
|                  | 150        | 8.42                                 | 27%                            |
|                  | 175        | 9.61                                 | 45%                            |
|                  | 200        | 10.74                                | 62%                            |
|                  | 225        | 11.8                                 | 78%                            |
|                  | 250        | 12.79                                | 93%                            |

**Supplementary Table 4. Photosynthetic efficiency effect on cyanobacteria biofilm productivity at 25°C.**

| <b>Photosynthetic efficiency, <math>\alpha</math></b><br><b>(mol C/mol photon)</b> | <b>Productivity</b><br><b>(g/m<sup>2</sup>/day)</b> | <b>% Increase over Mars base case</b> | <b>% of theoretical</b> | <b>Efficiency</b> |
|------------------------------------------------------------------------------------|-----------------------------------------------------|---------------------------------------|-------------------------|-------------------|
| 0.061                                                                              | 6.64                                                | 0%                                    | 0.488                   | 0%                |
| 0.07                                                                               | 7.72                                                | 16%                                   | 0.56                    | 15%               |
| 0.08                                                                               | 8.92                                                | 34%                                   | 0.64                    | 31%               |
| 0.09                                                                               | 10.11                                               | 52%                                   | 0.72                    | 48%               |
| 0.1                                                                                | 11.31                                               | 70%                                   | 0.8                     | 64%               |
| 0.11                                                                               | 12.5                                                | 88%                                   | 0.88                    | 80%               |
| 0.125                                                                              | 14.3                                                | 115%                                  | 1                       | 105%              |

**Supplementary Table 5. Einsteins to photon flux conversion**

|              | <b>einsteins</b> | <b>Photons</b> |
|--------------|------------------|----------------|
| <b>Earth</b> | 3.32E-04         | 2.00E+20       |
| <b>Mars</b>  | 1.43E-04         | 8.60E+19       |

## Supplementary Note 1. Unit operation specifications.

### Material density

- Stainless steel = 7.85 g/cm<sup>3</sup>
- Aluminum = 2.7 g/cm<sup>3</sup>
- Low density polyethylene (LDPE) = 1 g/cm<sup>3</sup>
- High density polyethylene (HDPE) = 1 g/cm<sup>3</sup>
- Cotton = 1.55 g/cm<sup>3</sup>
- Polyvinylchloride (PVC) = 1.38 g/cm<sup>3</sup>

### Suspended growth PBR

- 4.5 cm thick, 1 m tall, 45 m wide
- PBR material: 0.3 mm thick LDPE

### Biofilm growth substrate

- 1 m tall
- Growth substrate material: 0.3 mm thick cotton

### Biomass concentrator

- Reactor material = 6 cm thick steel

### Enzyme digester

- 20% headspace on volume determined by flow rate and desired residence time
- Reactor height:reactor radius ratio = 2.5
- Reactor material = 6 mm thick stainless steel
- Reactor residence time = 48 hours

### *E. coli* fermentation

- 20% headspace on volume determined by flow rate and desired residence time
- Reactor height:reactor radius ratio = 2.5
- Reactor material = 6 mm thick stainless steel
- Reactor residence time = 72 minutes

### Liquid-liquid equilibrium extraction

- 20% headspace on volume determined by flow rate and desired residence time
- Reactor height:reactor radius ratio = 2.5
- Reactor material = 6 mm thick stainless steel
- Reactor residence time = 60 minutes

### Membrane separation unit

- Reactor material = 6 cm thick stainless steel
- Membrane = polydimethylsiloxane/polyvinylidene fluoride

### Storage tanks

- 2,3-BDO storage: 16 m<sup>3</sup> storage tank made of 6 cm thick HDPE
- O<sub>2</sub> storage: 28 m<sup>3</sup> storage tank made of 6 cm thick HDPE

## Supplementary Note 2. Reactions and metabolites in engineered pathways.

### 1,2-Propanediol

Metabolites added:

Lacoyl-CoA: lac\_coa\_c

Reactions added:

Lactoyl-CoA transferase: lac\_\_D\_c + accoa\_c -> lac\_coa\_c + ac\_c

Lactaldehyde dehydrogenase: lac\_coa\_c + nadh\_c -> lald\_\_D\_c + nad\_c + coa\_c

Reactions removed:

MGSA: dhap\_c -> pi\_c + mthgxl\_c

AACTOOR: o2\_c + aact\_c + h2o\_c -> nh4\_c + mthgxl\_c + h2o2\_c

### 1,3-Butanediol

Metabolites added:

3-hydroxybutyraldehyde: 3hbald\_c

1,3-butanediol, cytosolic: 13bdo\_c

1,3-butanediol, extracellular: 13bdo\_e

Reactions added:

Butyraldehyde dehydrogenase: 3hbcoa\_c + nadh\_c -> 3hbald\_c + nad\_c + coa\_c

Butyraldehyde dehydrogenase: 3hbald\_c + nadh\_c -> 13bdo\_c + nad\_c

1,3-BDO transport: 13bdo\_c <=> 13bdo\_e

1,3-BDO exchange: 13bdo\_e <=>

### 2,3-Butanediol

Metabolites added:

R-acetoin: acetoin\_c

2,3-butanediol, cytosolic: 23bdo\_c

2,3-butanediol, extracellular: 23bdo\_e

Reactions added:

$\alpha$ -Acetolactate decarboxylase: alac\_\_S\_c -> acetoin\_c, 'co2\_c

2,3-Butanediol dehydrogenase: acetoin\_c + nadh\_c -> 23bdo\_c + nad\_c

2,3-BDO transport: 23bdo\_c <=> 23bdo\_e

2,3-BDO exchange: 23bdo\_e <=>

## Supplementary references

1. Karemore, A., Yuan, Y., Porubsky, W. & Chance, R. Biomass and pigment production for *Arthrospira platensis* via semi-continuous cultivation in photobioreactors: temperature effects. *Biotechnol. Bioeng.* **117**, 3081-3093 (2020).
2. Verseux, C. et al. Sustainable life support on Mars – the potential roles of cyanobacteria. *Int. J. Astrobiol.* **15**, 65-92 (2015).
3. Li, T., Piltz, B., Podola, B., Dron, A., de Beer, D., Melkonian, M. Microscale profiling of photosynthesis-related variables in a highly productive biofilm photobioreactor, *Biotechnol Bioeng*, **113**, 1046-1055 (2015).
4. Clippinger, J.N. & Davis, R.E. Techno-economic analysis for the production of algal biomass via closed photobioreactors: future cost potential evaluated across a range of cultivation system designs. *National Renewable Energy Laboratory NREL/TP-5100-72716* (2019).
